# Supplementary material for: Nodule-Enriched GRETCHEN HAGEN 3 Enzymes Have Distinct Substrate Specificities and Are Important for Proper Soybean Nodule Development
Source: MDPI journal article supplement (doi:10.3390/ijms18122547), 2017-11-28
Supplement: s1 [file s1]

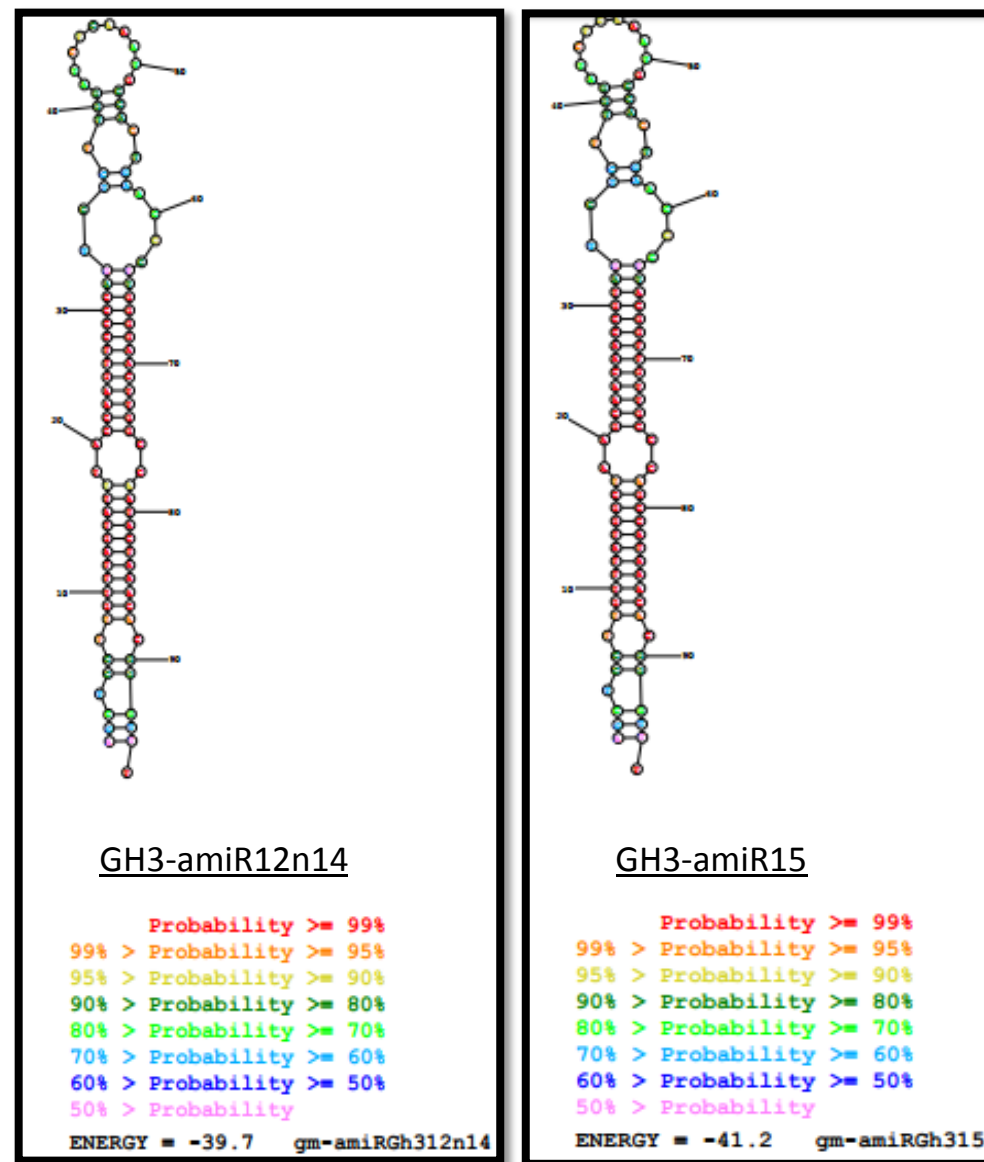

**Figure S1.** Secondary structures of artificial miRNA precursors (GH3-amiR12n14 and GH3-amiR15). The designed artificial miRNA sequences were inserted in to the backbone of gma-miR164a replacing the original miRNA and miRNA\* sequences. Image were generated using <https://rna.urmc.rochester.edu/RNAstructureWeb/Servers/Predict1/Predict1.html>

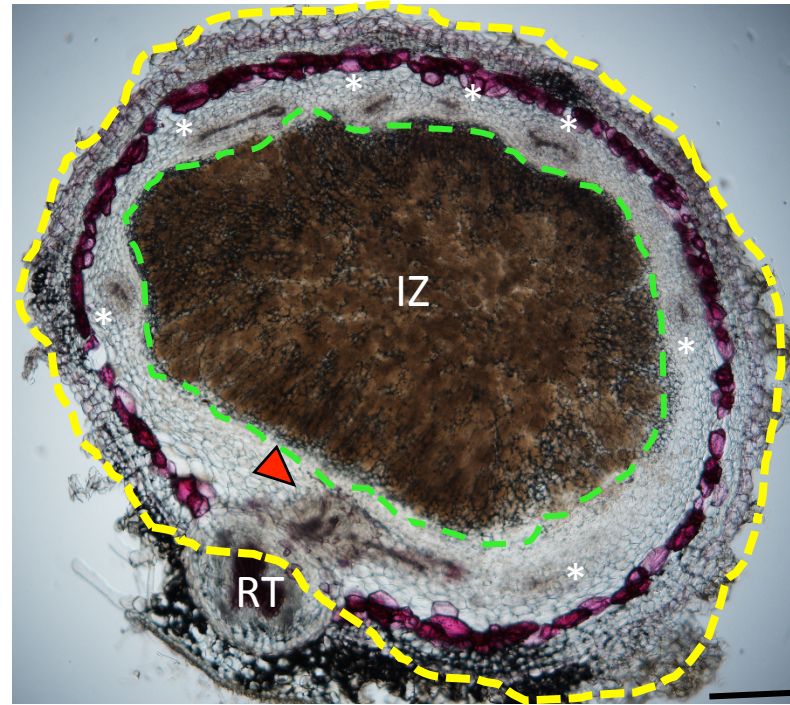

**Figure S2.** Median transverse section of a mature nodule stained with phloroglucinol. The nodule infection zone boundary is marked with a green dotted line and the nodule boundary is marked with a yellow dotted line. The nodule vascular bundle at the root-nodule junction is indicated using a red arrowhead and the vascular bundles within the nodule are indicated using asterisks. IZ – Infection Zone; RT – root vasculature. Scale bar – 100 $\mu$ m.
